# Supplementary material
Source: ML conference proceedings conference paper supplement (https://openaccess.thecvf.com/content/ACCV2020/html/Yang_RE-Net_A_Relation_ACCV_2020_paper.html)
Supplement: Supplementary file 1 [file Yang_RE-Net_A_Relation_ACCV_2020_supplemental.pdf]

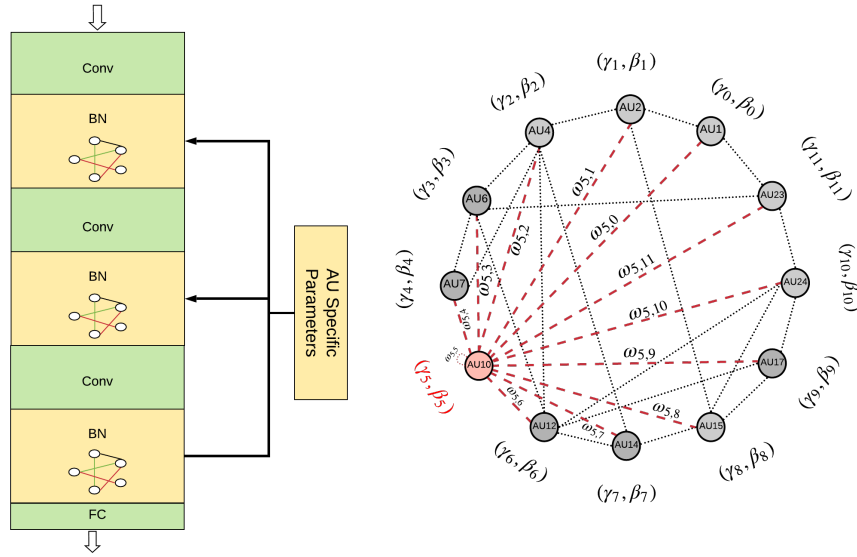

**Fig. 1.** Framework of proposed method. Each BN layer of the Resnet18 is replaced by its counterpart, calculated as Eq(4) and Eq(5). Each AU in the graph (circles) contains its own parameters  $(\gamma, \beta)$ , and is connected to the others through dotted lines with weight  $\omega_{i,j}$ . The convolutional layers are shared by all the AUs. For example, if we aim to detect AU10 (red circle) for the input image, the shared convolutional layers and the AU-specific parameters  $(\gamma_{10}, \beta_{10})$  are combined to predict the absent or occurrence of AU10, where  $(\gamma_{10}, \beta_{10})$  is computed as a weighted combination of the connected AUs in the graph. To make the model's training procedure as fast as the training of ResNet18, a single AU is randomly selected to optimize for each training batch. The graph is constructed using the Pearson Correlation Coefficient (PCC) calculated from the AU labels in the training dataset.
